# Supplementary material for: Dielectric switching in correlation with the structural phase transitions in tetrapropylammonium perchlorate
Source: Royal Society of Chemistry journal article supplement (doi:10.1039/d2cp03665g), 2022-12-05
Supplement: d2cp03665g1.pdf [file d2cp03665g1.pdf]

**Dielectric switching in correlation to the structural phase transitions in tetrapropylammonium perchlorate.**

Monika Trzebiatowska<sup>a</sup>, Dorota A. Kowalska<sup>a</sup>, Marek Gusowski<sup>b\*</sup>, Ewelina Jach<sup>b</sup>, Agnieszka Ciżman<sup>b</sup>

<sup>a</sup>*Institute of Low Temperature and Structure Research, Polish Academy of Sciences, 50-422 Wrocław, Poland*

<sup>b</sup>*Faculty of Fundamental Problems of Technology, Wrocław University of Science and Technology, Wybrzeże Wyspiańskiego 27, 50-370, Wrocław, Poland*

\*corresponding author; e-mail: [marek.gusowski@pwr.edu.pl](mailto:marek.gusowski@pwr.edu.pl)

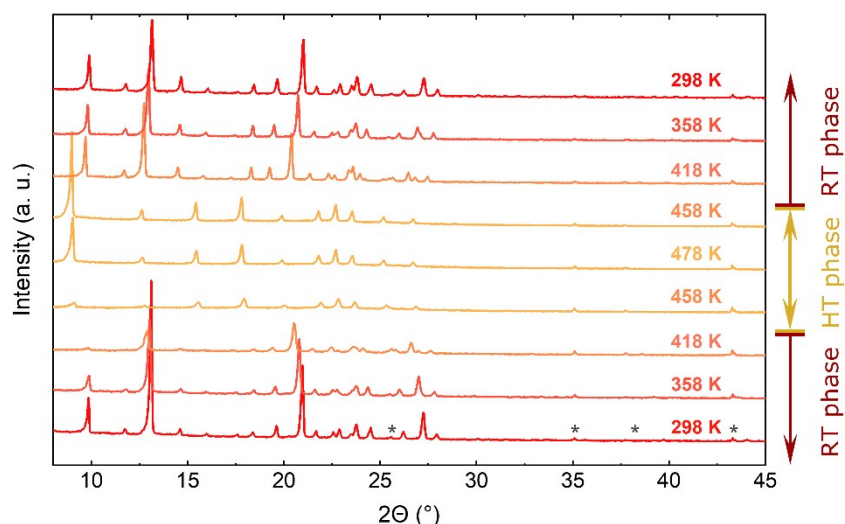

**Fig. S1.** The Set of PXRD diagrams showing reversible RT  $\leftrightarrow$  HT phase transition in TePrAClO<sub>4</sub>. The intensities marked with asterisks are from Al<sub>2</sub>O<sub>3</sub> in the sample holder and are present in all shown diffraction patterns.

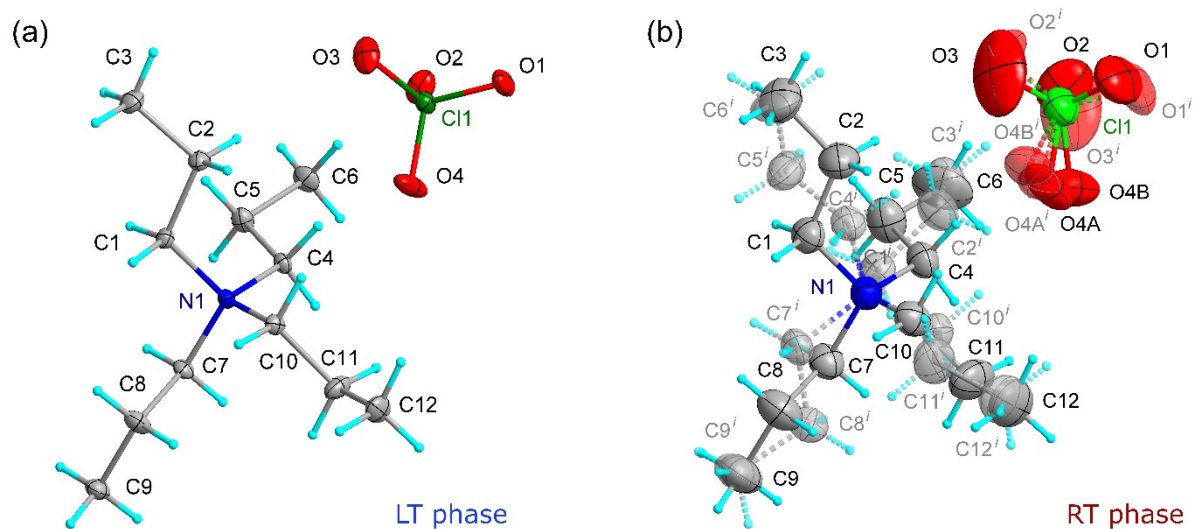

**Fig. S2.** The comparison of the asymmetric units of TePrAClO<sub>4</sub> in LT phase (a) and in RT phase (b). The atom numbering scheme is shown. Symmetry code: (i)  $x, y, -z+1/2$ . All non-hydrogen atoms are shown in ellipsoid representation at 40% probability level.

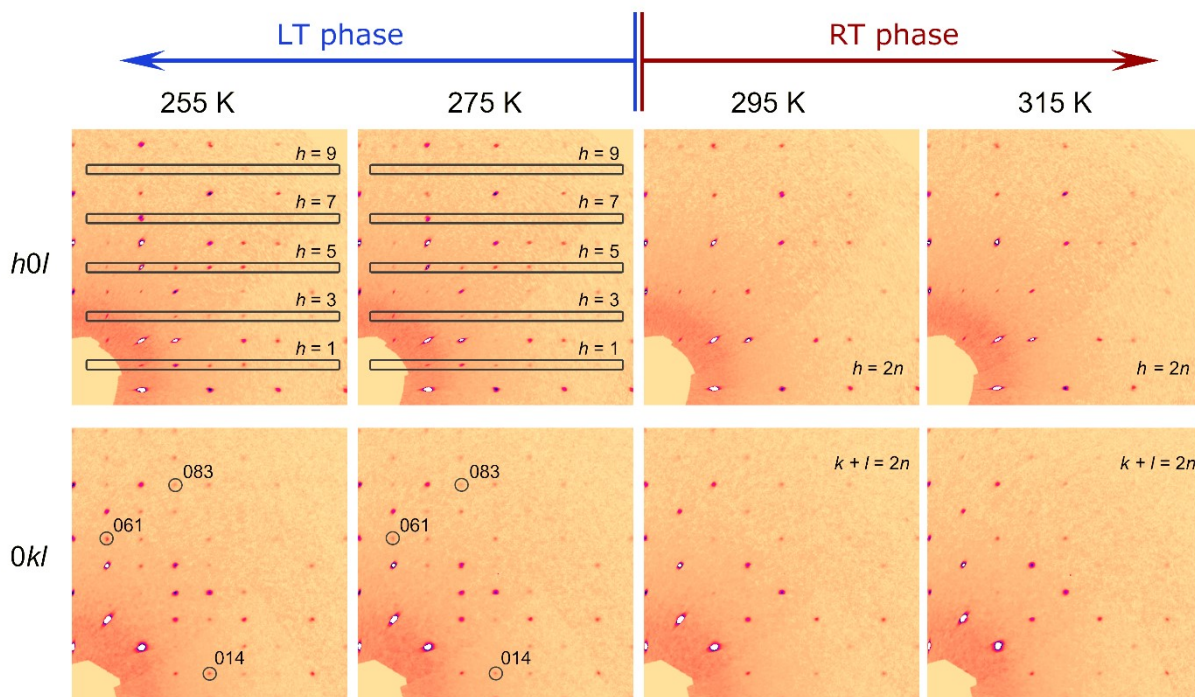

**Fig. S3.** The sections of the reciprocal space confirming the structural phase transition (PT1). The additional Bragg peaks appear below PT1 (some of them are edged with black).

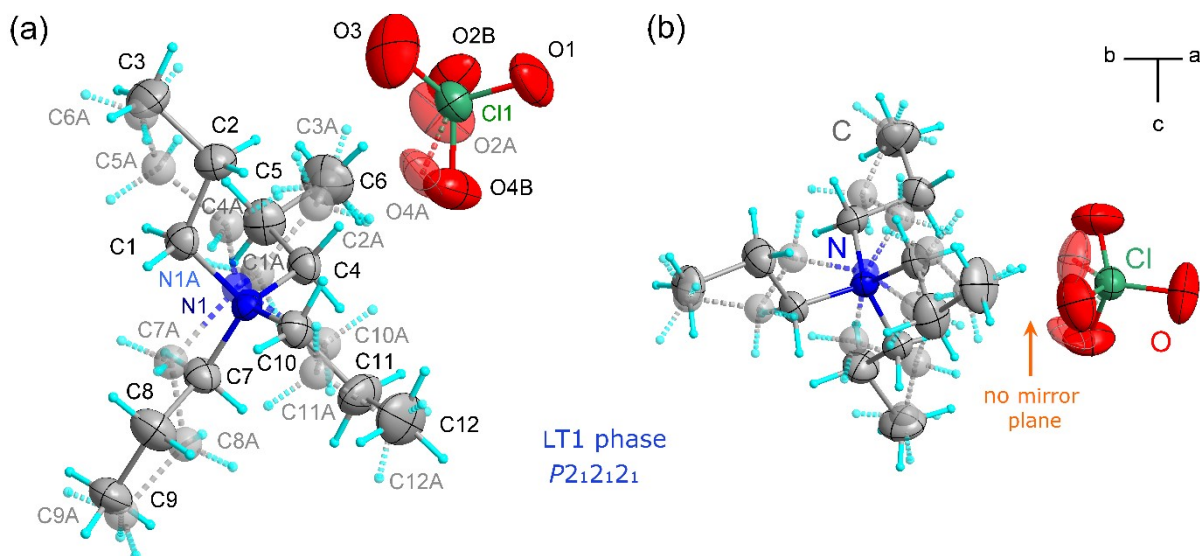

**Fig. S4.** (a) The asymmetric unit of TePrAClO<sub>4</sub> in LT1 phase at 275 K. (b) The absence of a mirror plane (perpendicular to the *c* crystallographic direction) below PT1 in LT1 phase is designated by an arrow. Non-hydrogen atoms are shown in ellipsoid representation at 40% probability level, except atoms belonging to the disordered moiety (11% of all TePrA<sup>+</sup> cations) which are shown in standard representation.

**Table S1.** Diffraction experimental details for LT1 phase of TePrAClO<sub>4</sub>.

$M_r = 285.80$ ,  $Z = 4$ ; chemical formula: ClO<sub>4</sub>·(C<sub>3</sub>H<sub>7</sub>)<sub>4</sub>N; crystal form: block; crystal colour: colourless; numerical absorption correction based on gaussian integration over a multifaceted crystal model was applied; empirical absorption correction using spherical harmonics, implemented in SCALE3 ABSPACK scaling algorithm; all H-atom parameters were constrained.

| Phase                                                        | LT1                                     |
|--------------------------------------------------------------|-----------------------------------------|
| <b>Crystal data</b>                                          |                                         |
| Crystal system                                               | Orthorhombic                            |
| Space group                                                  | $P2_12_12_1$ (no. 19)                   |
| Temperature (K)                                              | 275                                     |
| $a, b, c$ (Å)                                                | 13.548(3), 12.230(3), 9.700(2)          |
| $V$ (Å <sup>3</sup> )                                        | 1607.2(9)                               |
| $\mu$ (mm <sup>-1</sup> )                                    | 0.25                                    |
| Crystal size (mm)                                            | 0.24 × 0.13 × 0.10                      |
| <b>Data collection</b>                                       |                                         |
| Refl. measured/ unique/observed [ $I > 2\sigma(I)$ ]         | 17869/ 3856/ 2340                       |
| $R_{int}$                                                    | 0.040                                   |
| $(\sin \theta/\lambda)_{max}$ (Å <sup>-1</sup> )             | 0.668                                   |
| <b>Refinement</b>                                            |                                         |
| $R[F^2 > 2\sigma(F^2)]$ , $wR(F^2)$ , $S$                    | 0.048, 0.114, 1.01                      |
| Data/ parameters / restraints                                | 3856/ 243/ 13                           |
| $\Delta\rho_{max}$ , $\Delta\rho_{min}$ (e Å <sup>-3</sup> ) | 0.20, -0.27                             |
| Absolute structure                                           | Refined as a 2-component inversion twin |
| Abs. struct. param.                                          | 0.55 (12)                               |

**Table S2.** Selected hydrogen bond parameters for TePrAClO<sub>4</sub>.

|           | Temp. | <i>D</i> —H... <i>A</i>                               | <i>D</i> —H (Å) | H... <i>A</i> (Å) | <i>D</i> ... <i>A</i> (Å) | <i>D</i> —H... <i>A</i> (°) |
|-----------|-------|-------------------------------------------------------|-----------------|-------------------|---------------------------|-----------------------------|
| RT phase  | 295 K | C1—H1 <i>B</i> ...O1 <sup>i</sup>                     | 0.97            | 2.70              | 3.662 (5)                 | 171                         |
|           |       | C1—H1 <i>A</i> ...O3 <sup>ii</sup>                    | 0.97            | 2.60              | 3.534 (5)                 | 161                         |
|           |       | C3—H3 <i>C</i> ...O1 <sup>ii</sup>                    | 0.96            | 2.50              | 3.39 (2)                  | 154                         |
|           |       | C4—H4 <i>A</i> ...O4 <i>B</i>                         | 0.97            | 2.70              | 3.624 (3)                 | 153                         |
|           |       | C5—H5 <i>B</i> ...O4 <i>B</i> <sup>i</sup>            | 0.97            | 2.52              | 3.182 (5)                 | 126                         |
|           |       | C6—H6 <i>C</i> ...O1 <sup>iii</sup>                   | 0.96            | 2.61              | 3.28 (2)                  | 127                         |
|           |       | C7—H7 <i>B</i> ...O3 <sup>iii</sup>                   | 0.97            | 2.25              | 3.38 (2)                  | 161                         |
|           |       | C10—H10 <i>A</i> ...O4 <i>A</i>                       | 0.97            | 2.49              | 3.34 (2)                  | 146                         |
| LT1 phase | 275 K | C1—H1 <i>B</i> ...O3 <sup>iv</sup>                    | 0.97            | 2.51              | 3.430 (6)                 | 158                         |
|           |       | C4—H4 <i>A</i> ...O2 <i>A</i>                         | 0.97            | 2.56              | 3.50 (2)                  | 162                         |
|           |       | C5—H5 <i>A</i> ...O4 <i>A</i> <sup>v</sup>            | 0.97            | 2.58              | 3.31 (2)                  | 133                         |
|           |       | C6—H6 <i>C</i> ...O1 <sup>vi</sup>                    | 0.96            | 2.66              | 3.41 (2)                  | 136                         |
|           |       | C7—H7 <i>A</i> ...O2 <i>A</i> <sup>vi</sup>           | 0.97            | 2.57              | 3.53 (2)                  | 171                         |
|           |       | C10—H10 <i>B</i> ...O4 <i>A</i>                       | 0.97            | 2.40              | 3.32 (2)                  | 159                         |
|           |       | C3 <i>A</i> —H3 <i>AA</i> ...O1 <sup>vi</sup>         | 0.96            | 2.74              | 3.40 (7)                  | 127                         |
|           |       | C4 <i>A</i> —H4 <i>AB</i> ...O3 <sup>iv</sup>         | 0.97            | 2.62              | 3.50 (3)                  | 150                         |
|           |       | C5 <i>A</i> —H5 <i>AA</i> ...O4 <i>B</i> <sup>v</sup> | 0.97            | 2.55              | 3.21 (4)                  | 126                         |
|           |       | C7 <i>A</i> —H7 <i>AA</i> ...O3 <sup>iv</sup>         | 0.97            | 2.56              | 3.45 (3)                  | 154                         |
|           |       | C10 <i>A</i> —H10 <i>D</i> ...O4 <i>B</i>             | 0.97            | 2.47              | 3.34 (3)                  | 149                         |
| LT phase  | 100 K | C1—H1 <i>A</i> ...O1 <sup>v</sup>                     | 0.97            | 2.59              | 3.551 (2)                 | 170                         |
|           |       | C1—H1 <i>B</i> ...O3 <sup>iv</sup>                    | 0.97            | 2.41              | 3.341 (2)                 | 160                         |
|           |       | C4—H4 <i>A</i> ...O4                                  | 0.97            | 2.58              | 3.466 (2)                 | 153                         |
|           |       | C5—H5 <i>B</i> ...O4 <sup>v</sup>                     | 0.97            | 2.57              | 3.409 (2)                 | 144                         |
|           |       | C6—H6 <i>C</i> ...O1 <sup>vi</sup>                    | 0.96            | 2.60              | 3.318 (2)                 | 132                         |
|           |       | C7—H7 <i>B</i> ...O2 <sup>vi</sup>                    | 0.97            | 2.52              | 3.469 (2)                 | 165                         |
|           |       | C10—H10 <i>A</i> ...O4                                | 0.97            | 2.42              | 3.270 (2)                 | 146                         |

Symmetry codes: (i)  $x-1/2, -y+3/2, z$ ; (ii)  $-x+1/2, y+1/2, -z$ ; (iii)  $-x+1/2, y+1/2, z+1/2$ ; (iv)  $-x+1, y+1/2, -z+1/2$ ; (v)  $x-1/2, -y+3/2, -z$ ; (vi)  $-x+1, y+1/2, -z-1/2$ .

**Table S3.** The observed Raman and IR modes (in  $\text{cm}^{-1}$ ) of  $\text{TePr}_4\text{AlClO}_4$  and their proposed assignment.

| $\text{TePr}_4\text{AlClO}_4$ |        |        |        |        |        | Assignment                                                                                                                       |
|-------------------------------|--------|--------|--------|--------|--------|----------------------------------------------------------------------------------------------------------------------------------|
| IR                            |        |        | Raman  |        |        |                                                                                                                                  |
| 80 K                          | 350 K  | 490 K  | 80 K   | 300 K  | 470 K  |                                                                                                                                  |
| 3010sh                        |        |        | 3015m  | 3009m  |        | $\nu_{\text{as}}\text{CH}_3$ $\nu_{\text{s}}\text{CH}_3$                                                                         |
| 2999sh                        |        |        | 2994m  |        |        | $\nu_{\text{s}}\text{CH}_3$                                                                                                      |
| 2981m                         | 2980m  | 2978m  | 2981s  | 2982vs | 2977s  | $\nu_{\text{as}}\text{CH}_3$ $\nu_{\text{as}}\text{CH}_2$<br>$\nu_{\text{s}}\text{CH}_3$ $\nu_{\text{s}}\text{CH}_2$             |
| 2974m                         | 2972sh |        | 2959vs | 2961s  | 2960s  | $\nu_{\text{as}}\text{CH}_3$ $\nu_{\text{as}}\text{CH}_2$<br>$\nu_{\text{s}}\text{CH}_3$ $\nu_{\text{s}}\text{CH}_2$             |
| 2952w                         |        |        | 2948sh | 2940vs | 2939vs | $\nu_{\text{s}}\text{CH}_2$                                                                                                      |
| 2944w                         | 2945w  | 2941w  | 2934s  |        |        | $\nu_{\text{as}}\text{CH}_2$ $\nu_{\text{s}}\text{CH}_2$                                                                         |
| 2920w                         |        |        | 2928s  | 2923sh | 2920sh | $\nu_{\text{s}}\text{CH}_2$                                                                                                      |
| 2885m                         | 2885w  | 2883w  | 2910m  |        |        | $\nu_{\text{as}}\text{CH}_2$ $\nu_{\text{s}}\text{CH}_2$                                                                         |
| 2882m                         |        |        | 2880s  | 2882s  | 2881s  | $\nu_{\text{as}}\text{CH}_2$ $\nu_{\text{s}}\text{CH}_2$                                                                         |
| 2806vw                        |        |        | 2806vw | 2802vw |        | overtone                                                                                                                         |
| 2796vw                        |        |        | 2784vw | 2784vw |        | overtone                                                                                                                         |
| 2788vw                        | 2784vw |        | 2741vw |        | 2745w  | overtone                                                                                                                         |
| 2734vw                        | 2738vw |        | 2734w  | 2739w  |        | overtone                                                                                                                         |
| 2534vw                        |        |        |        |        |        | combination                                                                                                                      |
| 2448vw                        | 2421vw |        |        |        |        | combination                                                                                                                      |
| 2187vw                        | 2193vw |        |        |        |        | overtone                                                                                                                         |
| 2027vw                        |        |        |        |        |        | overtone                                                                                                                         |
| 2014vw                        | 2018vw | 2021vw |        |        |        | overtone                                                                                                                         |
| 2003vw                        |        |        |        |        |        | overtone                                                                                                                         |
|                               |        |        | 1527vw |        |        | combination                                                                                                                      |
| 1488m                         |        | 1484sh | 1490w  |        |        | $\delta_{\text{as}}\text{CH}_3$                                                                                                  |
| 1480m                         | 1479m  | 1476w  | 1481w  | 1485vw |        | $\delta_{\text{as}}\text{CH}_3$ $\delta_{\text{as}}\text{CH}_2$<br>$\delta_{\text{s}}\text{CH}_3$ $\delta_{\text{s}}\text{CH}_2$ |
| 1474m                         |        |        |        |        |        | $\delta_{\text{as}}\text{CH}_3$                                                                                                  |
| 1467m                         | 1461w  | 1464sh | 1466sh |        |        | $\delta_{\text{as}}\text{CH}_3$                                                                                                  |
|                               |        |        | 1461m  | 1456m  | 1458w  | $\delta_{\text{s}}\text{CH}_2$                                                                                                   |
| 1456m                         |        |        | 1454m  | 1454sh |        | $\delta_{\text{as}}\text{CH}_2$ $\delta_{\text{s}}\text{CH}_2$                                                                   |
| 1446w                         |        |        |        |        |        | $\delta_{\text{as}}\text{CH}_2$                                                                                                  |
| 1441vw                        |        |        |        |        |        | $\delta_{\text{as}}\text{CH}_2$                                                                                                  |
| 1409vw                        | 1408vw |        | 1406w  | 1405vw |        | $\delta_{\text{as}}\text{CH}_2$ $\delta_{\text{s}}\text{CH}_2$                                                                   |
| 1394w                         | 1393vw |        |        |        |        | $\delta_{\text{as}}\text{CH}_2$                                                                                                  |
| 1384vw                        | 1386w  | 1387w  |        |        |        | $\delta_{\text{as}}\text{CH}_2$                                                                                                  |
| 1376vw                        |        |        |        |        |        | $\delta_{\text{as}}\text{CH}_2$                                                                                                  |
| 1360vw                        | 1359vw |        | 1359w  | 1359w  |        | $\omega\text{CH}_2$                                                                                                              |
| 1337vw                        |        |        | 1333m  | 1332w  |        | $\omega\text{CH}_2$                                                                                                              |
| 1331vw                        | 1333vw | 1329vw | 1322sh | 1318sh | 1321w  | $\omega\text{CH}_2$                                                                                                              |
| 1317vw                        | 1317vw |        | 1314w  | 1314w  |        | $\omega\text{CH}_2$                                                                                                              |

|        |        |        |        |        |        |                                                                 |
|--------|--------|--------|--------|--------|--------|-----------------------------------------------------------------|
| 1280vw | 1276vw |        | 1293vw | 1293vw |        | tCH <sub>2</sub>                                                |
|        |        |        | 1194vw | 1190vw |        | tCH <sub>2</sub>                                                |
| 1176w  |        |        | 1174vw | 1174vw |        | vCN                                                             |
|        |        |        | 1157vw | 1153vw |        | vCN                                                             |
|        |        |        | 1138w  | 1136w  | 1139vw | vCN                                                             |
| 1113s  |        | 1114sh |        |        |        | v <sub>as</sub> ClO <sub>4</sub> <sup>-</sup> (F <sub>2</sub> ) |
| 1105s  | 1108sh |        | 1105m  | 1102m  | 1102w  | v <sub>as</sub> ClO <sub>4</sub> <sup>-</sup> (F <sub>2</sub> ) |
| 1097vs | 1096vs |        | 1097w  | 1092sh |        | v <sub>as</sub> ClO <sub>4</sub> <sup>-</sup> (F <sub>2</sub> ) |
| 1091vs | 1090vs | 1091vs | 1090w  |        |        | v <sub>as</sub> ClO <sub>4</sub> <sup>-</sup> (F <sub>2</sub> ) |
| 1086vs |        |        | 1086w  | 1088sh |        | v <sub>as</sub> ClO <sub>4</sub> <sup>-</sup> (F <sub>2</sub> ) |
| 1077s  | 1079sh |        | 1076vw |        |        | v <sub>as</sub> ClO <sub>4</sub> <sup>-</sup> (F <sub>2</sub> ) |
| 1039w  | 1040w  |        | 1040m  | 1038m  |        | vCC                                                             |
|        |        |        | 1032m  | 1032m  | 1032m  | vCC                                                             |
| 992w   |        |        |        |        |        | ρCH <sub>3</sub> τCH <sub>2</sub>                               |
| 984m   | 983w   |        | 983vw  | 983vw  |        | ρCH <sub>3</sub> τCH <sub>2</sub>                               |
| 969m   | 969w   | 971w   | 970vw  | 968vw  |        | ρCH <sub>3</sub> τCH <sub>2</sub>                               |
| 933vw  | 932vw  | 931vw  | 933vs  | 931vs  | 931s   | v <sub>s</sub> ClO <sub>4</sub> <sup>-</sup> (A <sub>1</sub> )  |
| 922vw  | 921vw  |        | 920m   | 916w   |        | v <sub>s</sub> ClO <sub>4</sub> <sup>-</sup> (A <sub>1</sub> )  |
| 915vw  | 915sh  | 907vw  |        |        |        | ρCH <sub>3</sub> tCH <sub>2</sub>                               |
| 904vw  |        |        | 903m   | 909m   | 908m   | ρCH <sub>3</sub> tCH <sub>2</sub>                               |
| 883vw  | 880vw  |        | 880vw  | 880vw  |        | vCC                                                             |
| 868w   | 871vw  | 867vw  | 867vw  | 871vw  | 872vw  | vCC                                                             |
| 855w   | 852w   | 840vw  | 854w   | 852w   | 843w   | vCC                                                             |
| 774vw  |        |        | 774w   | 771w   |        | τCH <sub>2</sub>                                                |
| 761w   | 758w   | 759w   | 761w   | 759w   |        | τCH <sub>2</sub>                                                |
| 752w   | 752w   |        | 751vw  | 751vw  |        | τCH <sub>2</sub>                                                |
| 748w   |        |        |        |        |        | τCH <sub>2</sub>                                                |
| 622m   | 623m   | 623m   | 621w   | 623w   | 620w   | δ <sub>as</sub> ClO <sub>4</sub> <sup>-</sup> (F <sub>2</sub> ) |
|        |        |        | 517vw  | 516vw  |        | δCNC                                                            |
|        |        |        | 460w   |        |        | δ <sub>s</sub> ClO <sub>4</sub> <sup>-</sup> (E)                |
|        |        |        | 456w   | 457w   | 457w   | δ <sub>s</sub> ClO <sub>4</sub> <sup>-</sup> (E)                |
|        |        |        | 420w   |        |        | δCNC                                                            |
|        |        |        | 384vw  |        |        | δCNC δCCC                                                       |
|        |        |        | 370vw  | 367vw  | 370vw  | δCCC                                                            |
|        |        |        | 348vw  | 342vw  |        | δCCC                                                            |
|        |        |        | 310m   | 309m   | 307m   | LCIO <sub>4</sub> <sup>-</sup>                                  |
|        |        |        | 133sh  |        |        | T'ClO <sub>4</sub> <sup>-</sup>                                 |
|        |        |        | 126w   | 119w   |        | T'TePrA                                                         |
|        |        |        | 87w    | 77w    | 65m    | LTePrA                                                          |

s-very strong, s-strong, m-medium, w-weak, vw-very weak; v<sub>s</sub>-symmetric stretching, v<sub>as</sub>-asymmetric stretching, v<sub>s</sub>-symmetric stretching, v<sub>as</sub>-asymmetric stretching, δ<sub>as</sub>-asymmetric bending, δ<sub>s</sub>, δ-symmetric bending (scissoring), ρ-rocking, ω-wagging, τ-twisting (torsion), T-translation, L-libration;

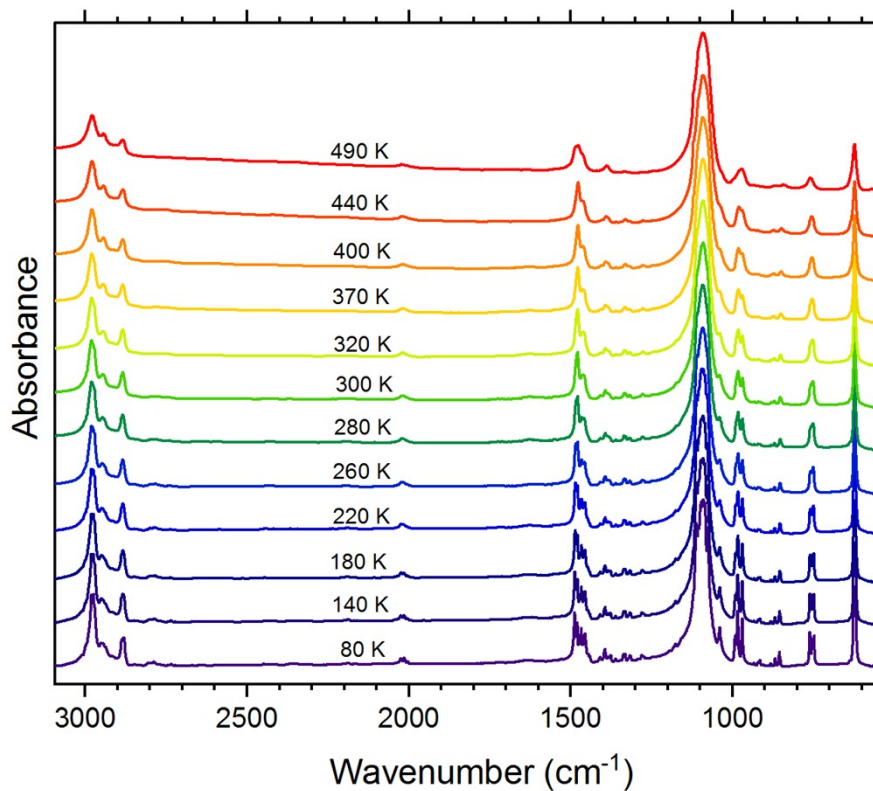

Fig. S5. The temperature-dependent IR spectra in the full wavenumber range of  $\text{TePrAClO}_4$ .

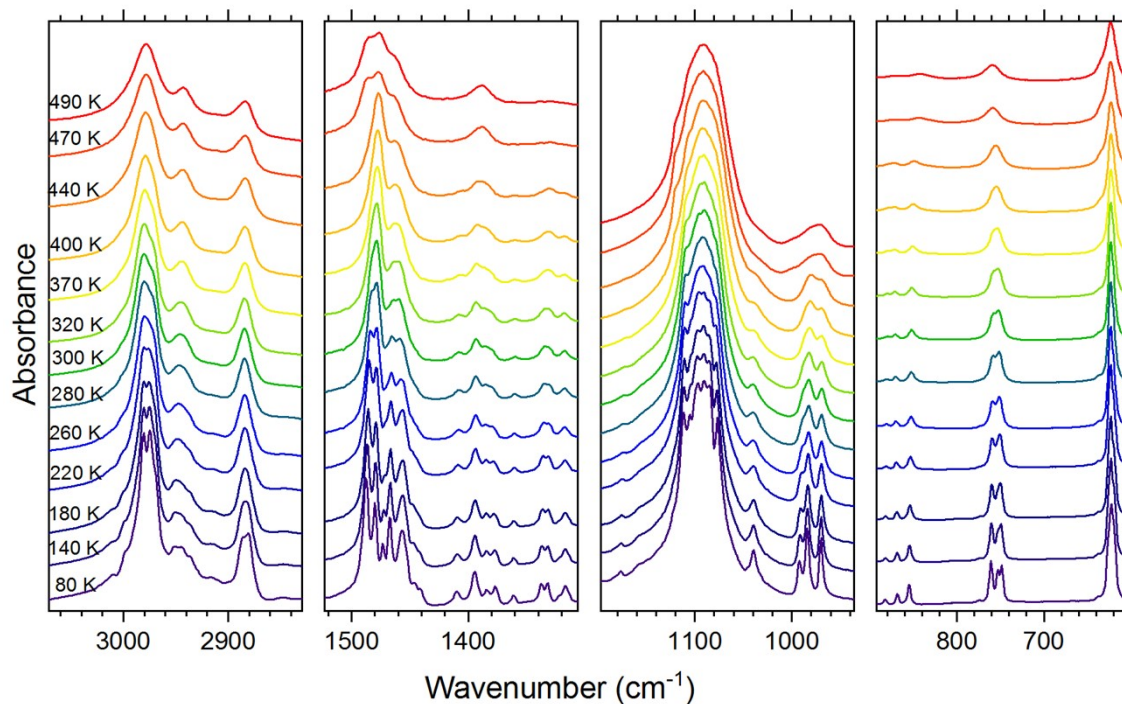

Fig. S6. The details of temperature-dependent IR spectra in the full wavenumber range of  $\text{TePrAClO}_4$ .



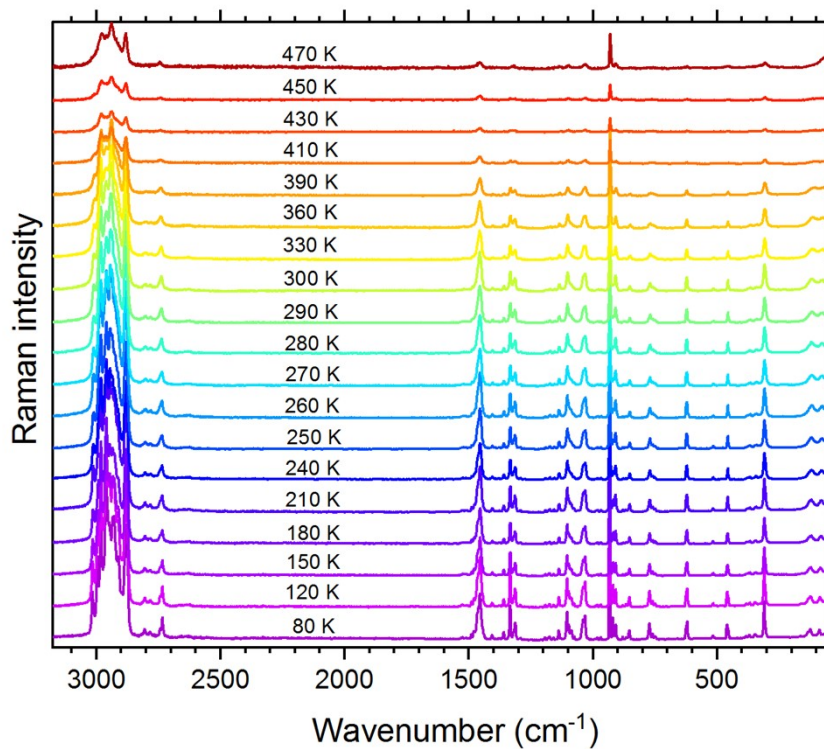

**Fig. S7.** The temperature-dependent Raman spectra in the full wavenumber range of  $\text{TePrAClO}_4$ .

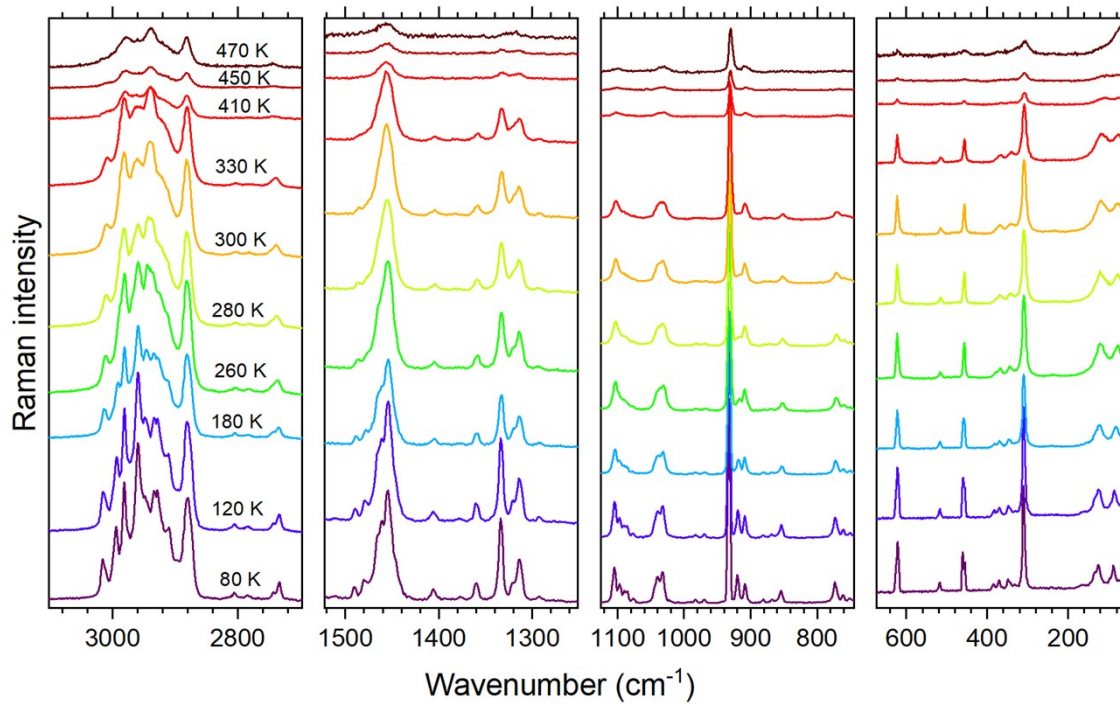

**Fig. S8.** The details of temperature-dependent Raman spectra in the full wavenumber range of  $\text{TePrAClO}_4$ .

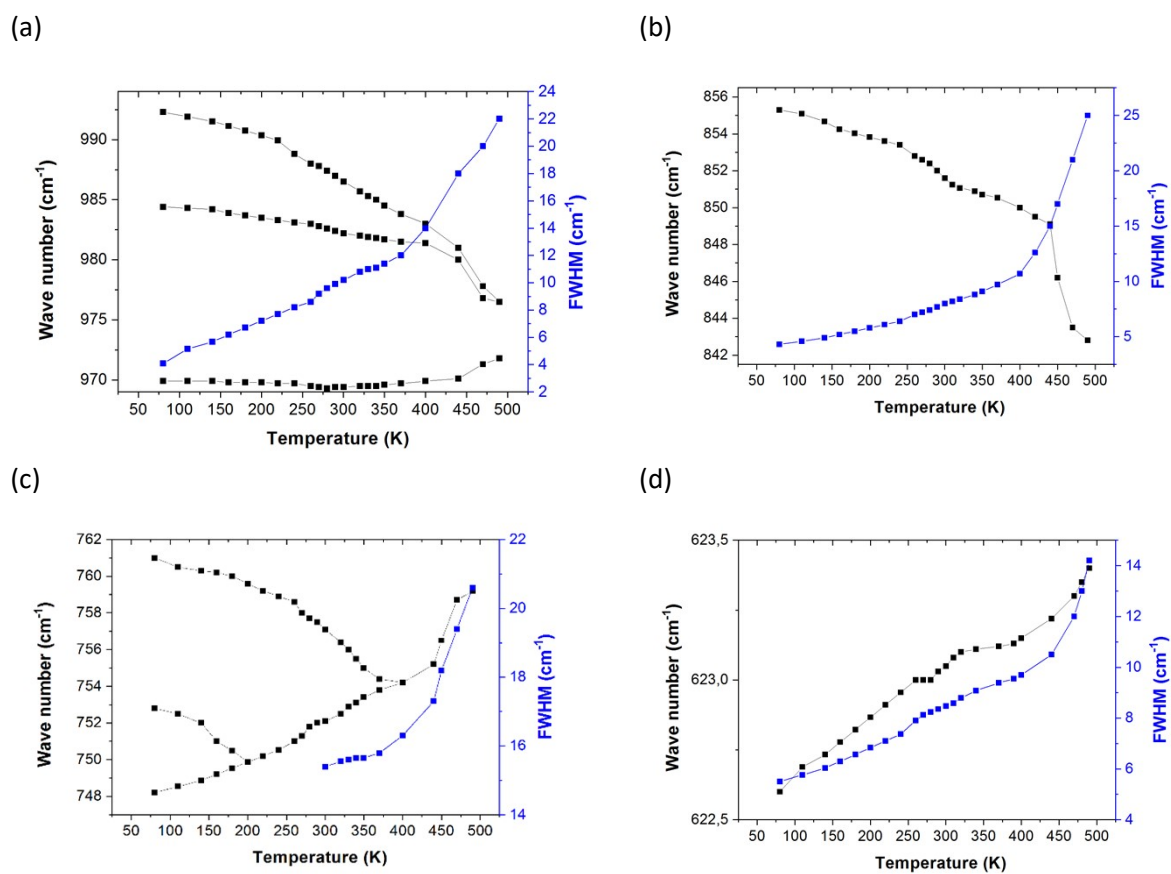

**Fig. S9.** The plots of the wavenumber and FWHM vs. T of the selected IR modes: (a) deformation  $\rho\text{CH}_3$  and  $\tau\text{CH}_2$ , (b)  $\nu\text{CC}$ , (c)  $\tau\text{CH}_2$  and (d)  $\delta_{\text{as}}\text{ClO}_4^- (\text{F}_2)$  in  $\text{TePrClO}_4$ .

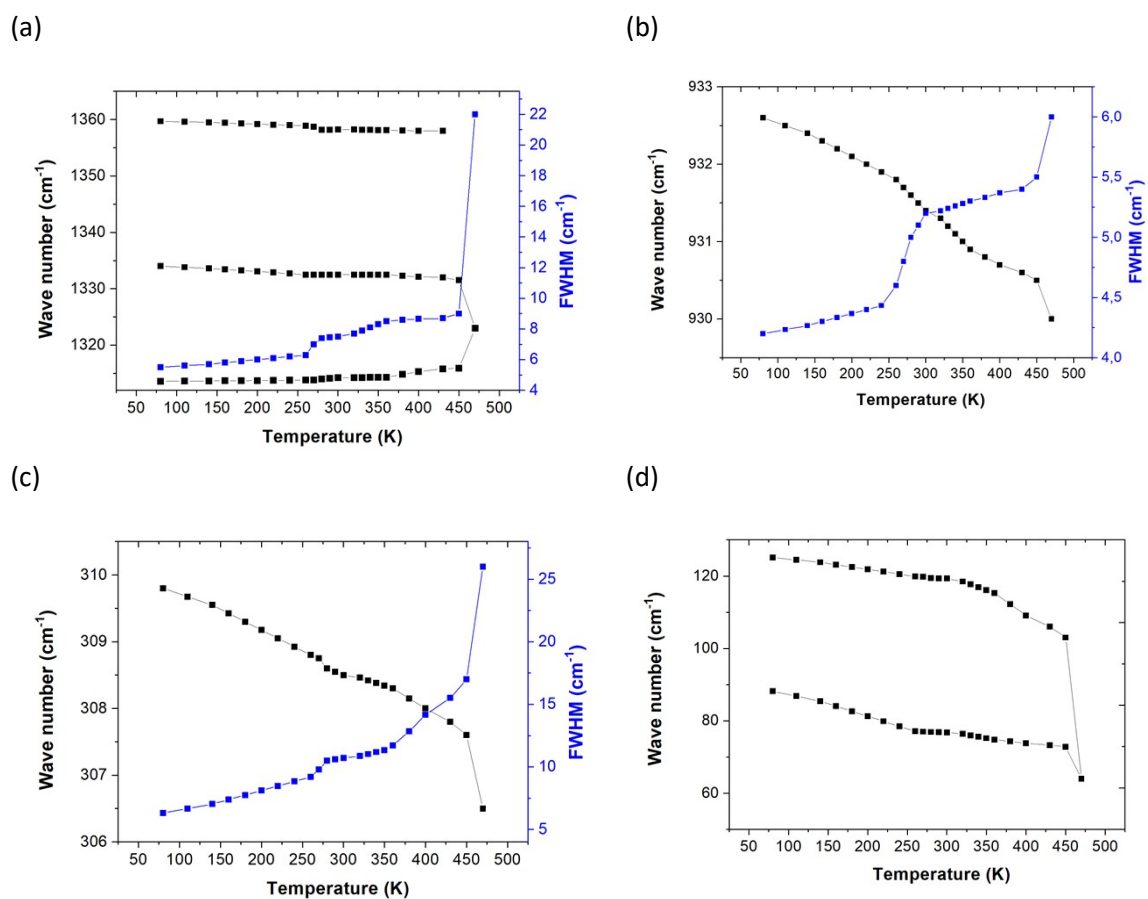

**Fig. S10.** The plots of the wavenumber and FWHM vs. T of the selected Raman modes: (a)  $\omega\text{CH}_2$ , (b)  $\nu_s\text{ClO}_4^- (\text{A}_1)$ , (c)  $\text{LCiO}_4^-$ , (d) translations  $\text{T}'\text{ClO}_4^-$  and translations and librations of  $\text{TePrA}^+$  cations in  $\text{TePrAClO}_4$ .

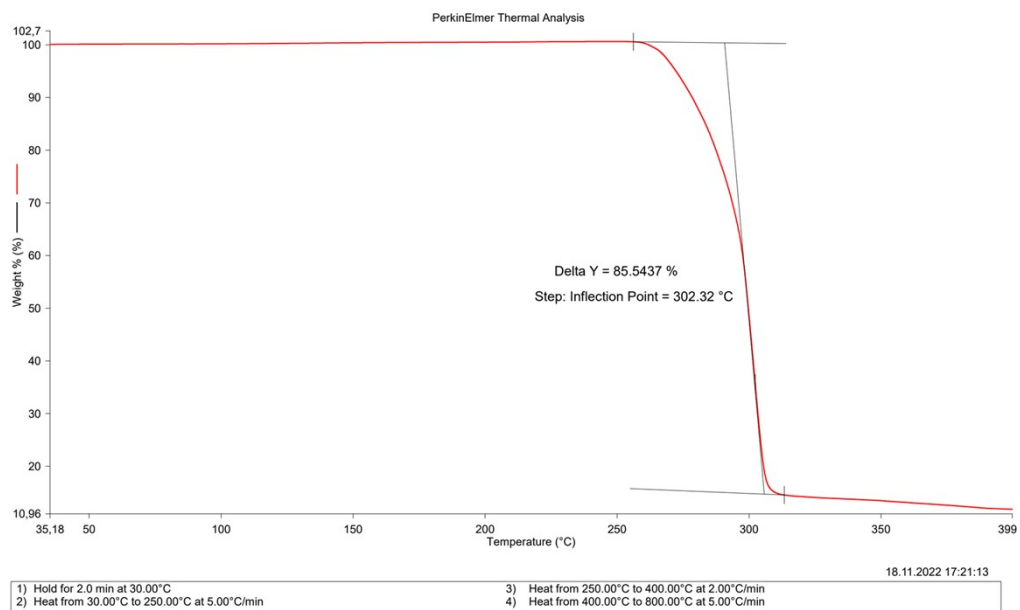

**Fig. S11.** The thermogravimetric analysis of TePrAClO<sub>4</sub>
